# Supplementary material
Source: publisher figshare collection journal article supplement (https://asha.figshare.com/articles/dataset/_/19241856)
Supplement: Supplementary file 1 [file 1]

**Supplemental Material S3.** Tables for model output and comparison.

**Table S1.** Model Comparison Results: Exemplar Variability

| Model      | logLikelihood | $\chi^2$ | <i>p</i> |
|------------|---------------|----------|----------|
| Base model | -1469.4       |          |          |
| Full model | -1439.6       | 59.551   | .002     |

**Table S2.** Output for Full Model

|                                              | Fixed Effects |       |        |      |        |        |
|----------------------------------------------|---------------|-------|--------|------|--------|--------|
| Parameter                                    | Estimate      | SE    | z      | p    | 95% CI |        |
| Intercept                                    | -0.169        | 0.474 | -0.357 | .721 | -1.097 | 0.759  |
| Visit Test2                                  | 0.326         | 0.360 | 0.905  | .366 | -0.380 | 1.031  |
| Visit Test3                                  | 0.854         | 0.365 | 2.340  | .019 | 0.139  | 1.570  |
| Visit Test4                                  | 0.356         | 0.366 | 0.973  | .330 | -0.361 | 1.073  |
| Language Spanish                             | 0.103         | 0.634 | 0.162  | .872 | -1.140 | 1.346  |
| Variability Condition Low                    | 0.472         | 0.605 | 0.780  | .435 | -0.713 | 1.657  |
| Trial Type Within-language Generalization    | 0.435         | 0.362 | 1.204  | .228 | -0.273 | 1.144  |
| Visit Test2 X Language Spanish               | 0.534         | 0.530 | 1.007  | .314 | -0.505 | 1.573  |
| Visit Test3 X Language Spanish               | -0.131        | 0.528 | -0.248 | .804 | -1.165 | 0.903  |
| Visit Test4 X Language Spanish               | 0.563         | 0.535 | 1.052  | .293 | -0.486 | 1.611  |
| Visit Test2 X Variability Condition Low      | -0.522        | 0.509 | -1.025 | .305 | -1.520 | 0.476  |
| Visit Test3 X Variability Condition Low      | -1.314        | 0.514 | -2.555 | .011 | -2.322 | -0.306 |
| Visit Test4 X Variability Condition Low      | -0.214        | 0.518 | -0.413 | .679 | -1.230 | 0.802  |
| Language Spanish X Variability Condition Low | -0.535        | 0.826 | -0.647 | .517 | -2.153 | 1.084  |

|                                                                                     |        |       |        |      |        |       |
|-------------------------------------------------------------------------------------|--------|-------|--------|------|--------|-------|
| Visit Test2 X Trial Type Within-language Generalization                             | 0.162  | 0.513 | 0.315  | .753 | -0.844 | 1.167 |
| Visit Test3 X Trial Type Within-language Generalization                             | -0.769 | 0.513 | -1.497 | .134 | -1.775 | 0.238 |
| Visit Test4 X Trial Type Within-language Generalization                             | -0.573 | 0.517 | -1.109 | .268 | -1.586 | 0.440 |
| Language Spanish X Trial Type Within-language Generalization                        | -0.652 | 0.523 | -1.246 | .213 | -1.676 | 0.373 |
| Variability Condition Low X Trial Type Within-language Generalization               | -0.342 | 0.512 | -0.667 | .505 | -1.345 | 0.661 |
| Visit Test2 X Language Spanish X Variability Condition Low                          | 0.345  | 0.734 | 0.469  | .639 | -1.094 | 1.784 |
| Visit Test3 X Language Spanish X Variability Condition Low                          | 1.392  | 0.731 | 1.904  | .057 | -0.041 | 2.826 |
| Visit Test4 X LanguageSpanish X Variability Condition Low                           | -0.559 | 0.737 | -0.758 | .448 | -2.005 | 0.886 |
| Visit Test2 X Language Spanish X Trial Type Within-language Generalization          | -0.412 | 0.748 | -0.550 | .582 | -1.879 | 1.055 |
| Visit Test3 X Language Spanish X Trial Type Within-language Generalization          | 1.135  | 0.745 | 1.523  | .128 | -0.325 | 2.595 |
| Visit Test4 X Language Spanish X Trial Type Within-language Generalization          | 0.629  | 0.754 | 0.835  | .404 | -0.848 | 2.106 |
| Visit Test2 X Variability Condition Low X Trial Type Within-language Generalization | 0.007  | 0.724 | 0.009  | .993 | -1.413 | 1.426 |
| Visit Test3 X Variability Condition Low X Trial Type Within-language Generalization | 1.534  | 0.727 | 2.109  | .035 | 0.108  | 2.959 |

|                                                                                                         |        |       |        |       |        |       |
|---------------------------------------------------------------------------------------------------------|--------|-------|--------|-------|--------|-------|
| Visit Test4 X Variability Condition Low X Trial Type Within-language Generalization                     | 0.914  | 0.737 | 1.240  | .215  | -0.530 | 2.358 |
| Language Spanish X Variability Condition Low X Trial Type Within-language Generalization                | 0.000  | 0.727 | 0.000  | 1.000 | -1.425 | 1.426 |
| Visit Test2 X Language Spanish X Variability Condition Low X Trial Type Within-language Generalization  | 0.112  | 1.038 | 0.108  | .914  | -1.923 | 2.146 |
| Visit Test3 X Language Spanish X Variability Condition Low X Trial Type Within-language Generalization  | -1.843 | 1.034 | -1.782 | .075  | -3.870 | 0.184 |
| Visit Test4 X Language Spanish: X Variability Condition Low X Trial Type Within-language Generalization | -0.157 | 1.047 | -0.150 | .881  | -2.208 | 1.895 |

#### Random Effects

|                           | Variance | SD    | Correlation |
|---------------------------|----------|-------|-------------|
| Participant (intercept)   | 1.023    | 1.011 |             |
| Item (intercept)          | .421     | .6485 |             |
| Variability Condition Low | .473     | .6880 | -.30        |
| Language Spanish          | 1.058    | 1.029 | -.72        |

#### Model Fit

|       | Conditional | Marginal |
|-------|-------------|----------|
| $R^2$ | .291        | .032     |

*Note.* Confidence intervals calculated using Wald method.

**Table S3.** Type II Wald test of Linear Hypothesis

|                                                       | $\chi^2$ | <i>df</i> | <i>p</i> |
|-------------------------------------------------------|----------|-----------|----------|
| Visit                                                 | 19.295   | 3         | .0002    |
| Language                                              | 0.019    | 1         | .891     |
| Variability Condition                                 | 0.149    | 1         | .699     |
| Trial Type                                            | 0.0005   | 1         | .982     |
| Visit X Language                                      | 8.006    | 3         | .046     |
| Visit X Variability Condition                         | 2.410    | 3         | .492     |
| Language X Variability Condition                      | 0.482    | 1         | .488     |
| Visit X Trial Type                                    | 0.636    | 3         | .888     |
| Language X Trial Type                                 | 9.224    | 1         | .002     |
| Variability Condition X Trial Type                    | 0.031    | 1         | .860     |
| Visit X Language X Variability Condition              | 5.513    | 3         | .138     |
| Visit X Language X Trial Type                         | 3.011    | 3         | .390     |
| Visit X Variability Condition X Trial Type            | 3.771    | 3         | .287     |
| Language X Variability Condition X Trial Type         | 1.65     | 1         | .199     |
| Visit X Language X Variability Condition X Trial Type | 4.687    | 3         | .196     |

**Table S4.** Model Comparison Results: BESA semantic scores

| Model      | logLikelihood | $\chi^2$ | <i>p</i> |
|------------|---------------|----------|----------|
| Base model | -277.83       |          |          |
| + Spanish  | -276.89       | 1.884    | 0.17     |
| + English  | -275.67       | 4.322    | 0.038    |

**Table S5.** Model Comparison Results: Language Sample Measures

| <b>Model</b> | <b>logLikelihood</b> | <b><math>\chi^2</math></b> | <b><i>p</i></b> |
|--------------|----------------------|----------------------------|-----------------|
| Base model   | -365.88              |                            |                 |
| + NDW        | -360.42              | 10.921                     | .001            |
| + NTW        | -360.39              | 0.060                      | .806            |
| + MLU        | -358.77              | 3.226                      | .072            |
| + SI         | -357.95              | 1.655                      | .198            |

**Table S6.** Model Comparison Results: Code-switching

| <b>Model</b>     | <b>logLikelihood</b> | <b><math>\chi^2</math></b> | <b><i>p</i></b> |
|------------------|----------------------|----------------------------|-----------------|
| Base model       | -365.87              |                            |                 |
| + Code-switching | 759.67               | 10.202                     | .006            |
