# Supplementary material
Source: publisher figshare collection journal article supplement (https://asha.figshare.com/articles/dataset/_/19241856)

## Supplemental Material S2. Figures for word learning outcomes.

**Figure SA.** Testing results for Spanish words across trial types.

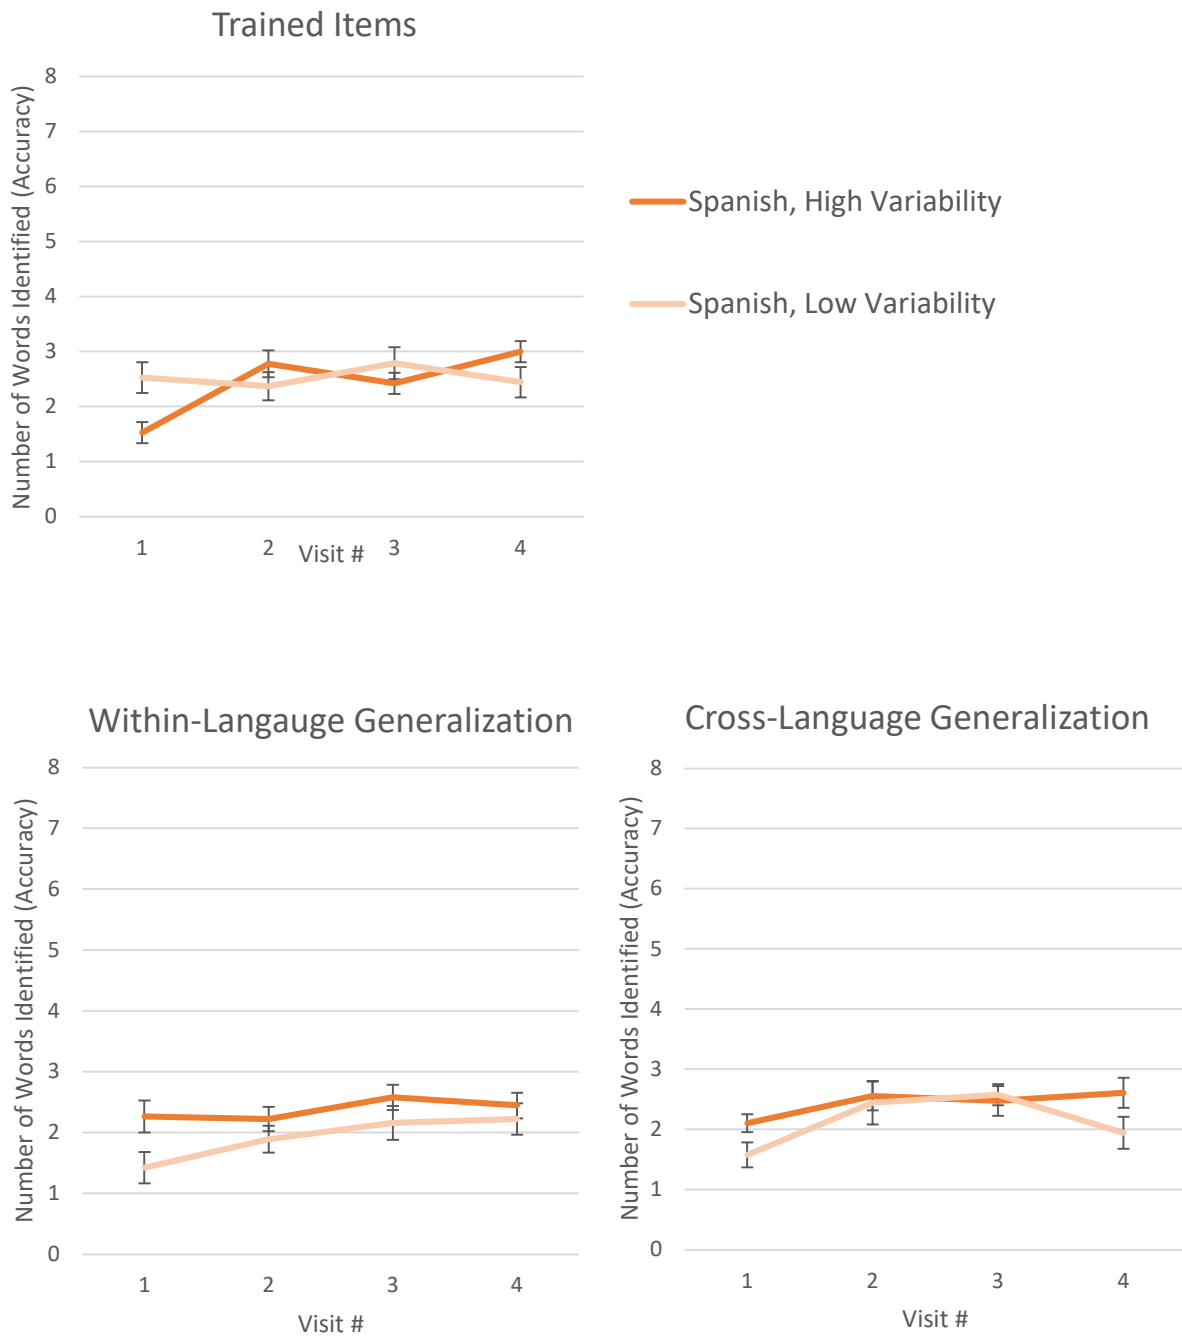

**Figure SB.** Testing results for English across trial types.

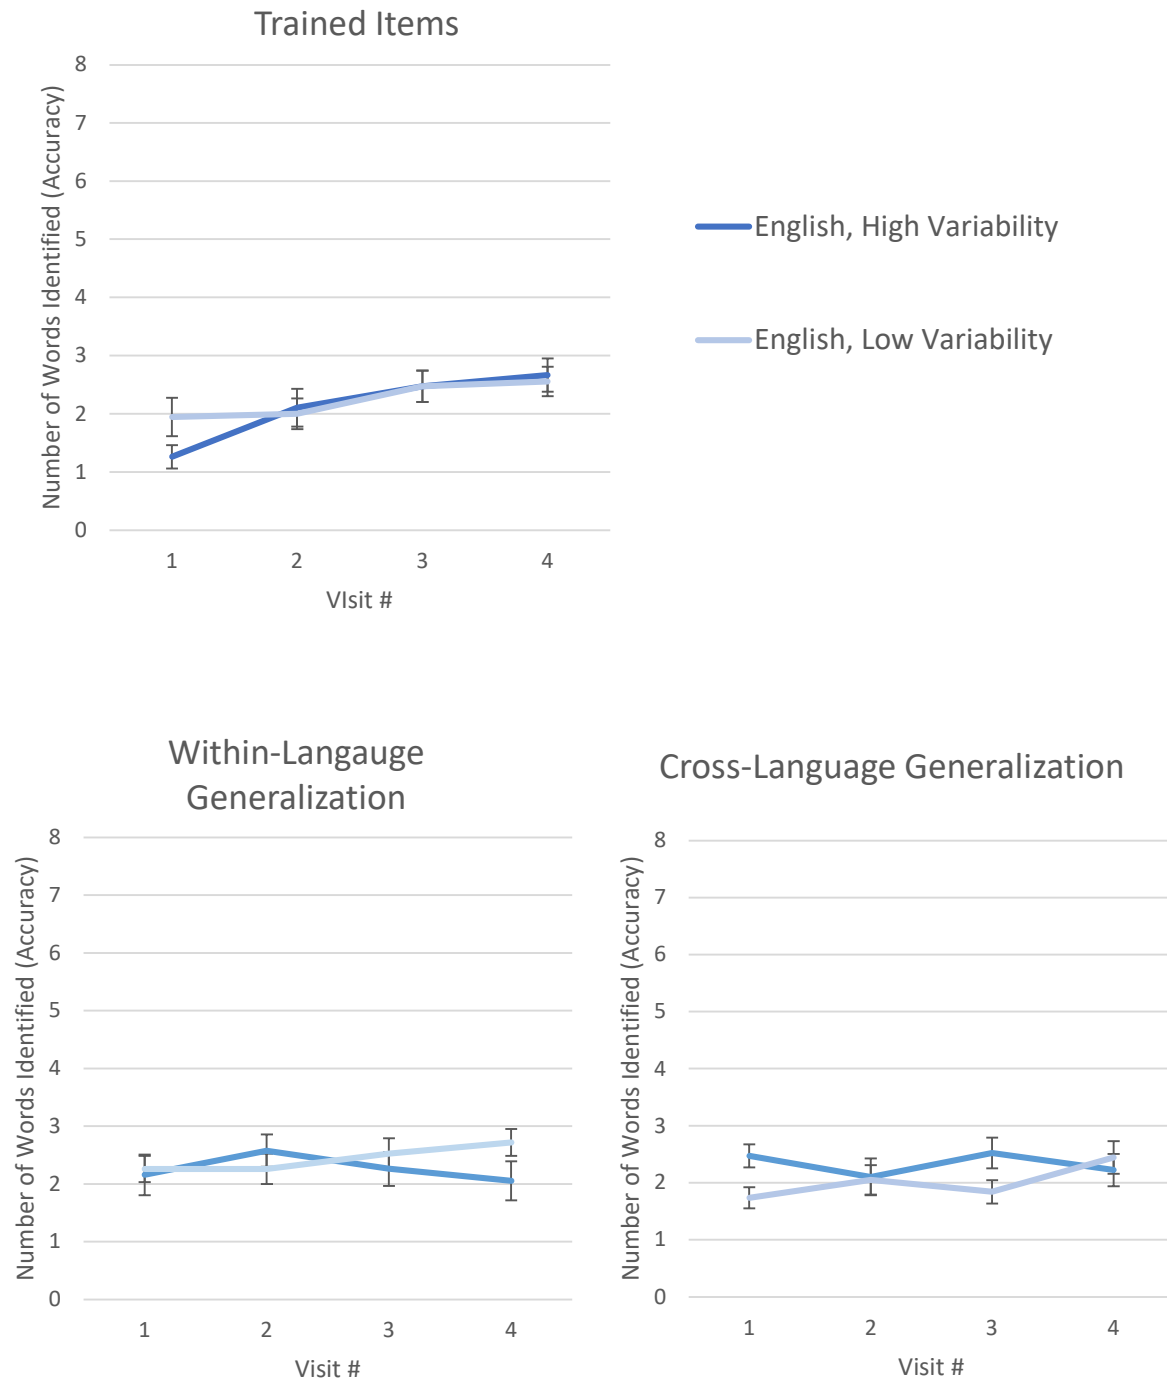

Supplement: Supplementary file 3 [file 1]
